# Supplementary material for: Molecular Orientation of a Terbium(III)-Phthalocyaninato Double-Decker Complex for Effective Suppression of Quantum Tunneling of the Magnetization
Source: MDPI journal article supplement (doi:10.3390/molecules22060999), 2017-06-15
Supplement: s1 [file s1]

# Molecular Orientation of Terbium(III)-Phthalocyaninato Double-Decker Complex for Effective Suppression of Quantum Tunneling of the Magnetization

Tsutomu Yamabayashi, Keiichi Katoh, Brian K. Breedlove and Masahiro Yamashita

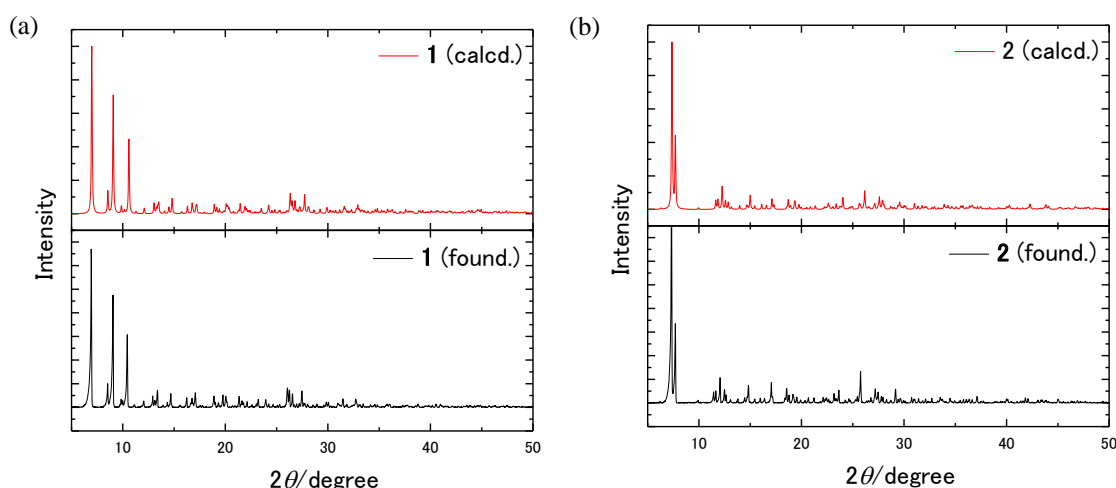

**Figure S1.** Comparison between experimental and simulated PXRD patterns (5–50°) for **1** and **2**.

The Generalized Debye Model (Equation (S1) and (S2))

$$\chi'(\omega) = \chi_s + (\chi_T - \chi_s) \frac{1 + (\omega\tau)^{1-\alpha} \sin(\pi\alpha/2)}{1 + 2(\omega\tau)^{1-\alpha} \sin(\pi\alpha/2) + (\omega\tau)^{2-2\alpha}} \quad (\text{S1})$$

$$\chi''(\omega) = (\chi_T - \chi_s) \frac{(\omega\tau)^{1-\alpha} \cos(\pi\alpha/2)}{1 + 2(\omega\tau)^{1-\alpha} \sin(\pi\alpha/2) + (\omega\tau)^{2-2\alpha}} \quad (\text{S2})$$

where  $\chi_s$  is the adiabatic susceptibility,  $\chi_T$  is the isothermal susceptibility,  $\omega = 2\pi\nu$ , ( $\nu$  is the frequency) is the angular frequency,  $\tau$  is the magnetization relaxation time, and  $\alpha$  is the quantitative parameter for the width of the  $\tau$  distribution.

Arrhenius equation (Equation (S3))

$$\tau = \tau_0 \exp(U_{\text{eff}} / k_B T) \quad (\text{S3})$$

where  $\tau$  is the magnetization relaxation time,  $\tau_0$  is the frequency factor,  $U_{\text{eff}}$  is the energy barrier for the reversal of the magnetization, and  $k_B$  is the Boltzmann constant.

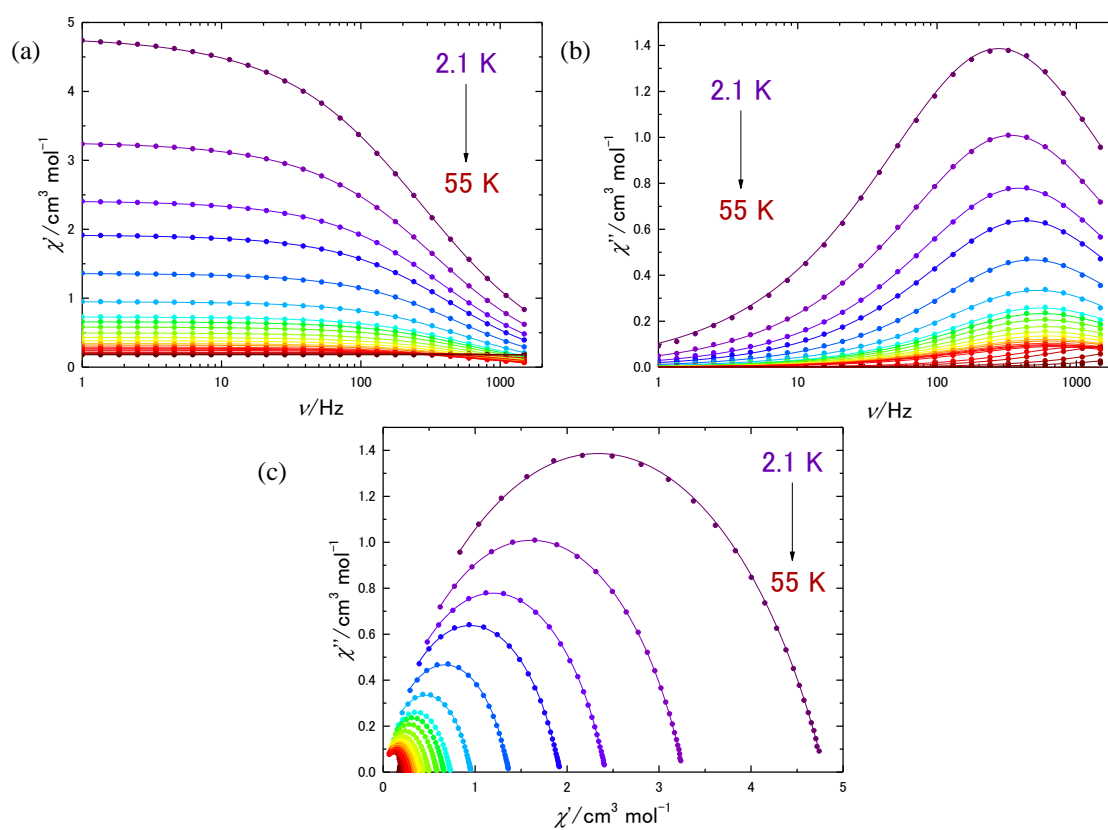

**Figure S2.** (a)  $\chi'_M$  and (b)  $\chi''_M$  versus  $\nu$  and (c) Argand plots for **1** in a zero field. The solid lines were fitted by using the generalized Debye model.

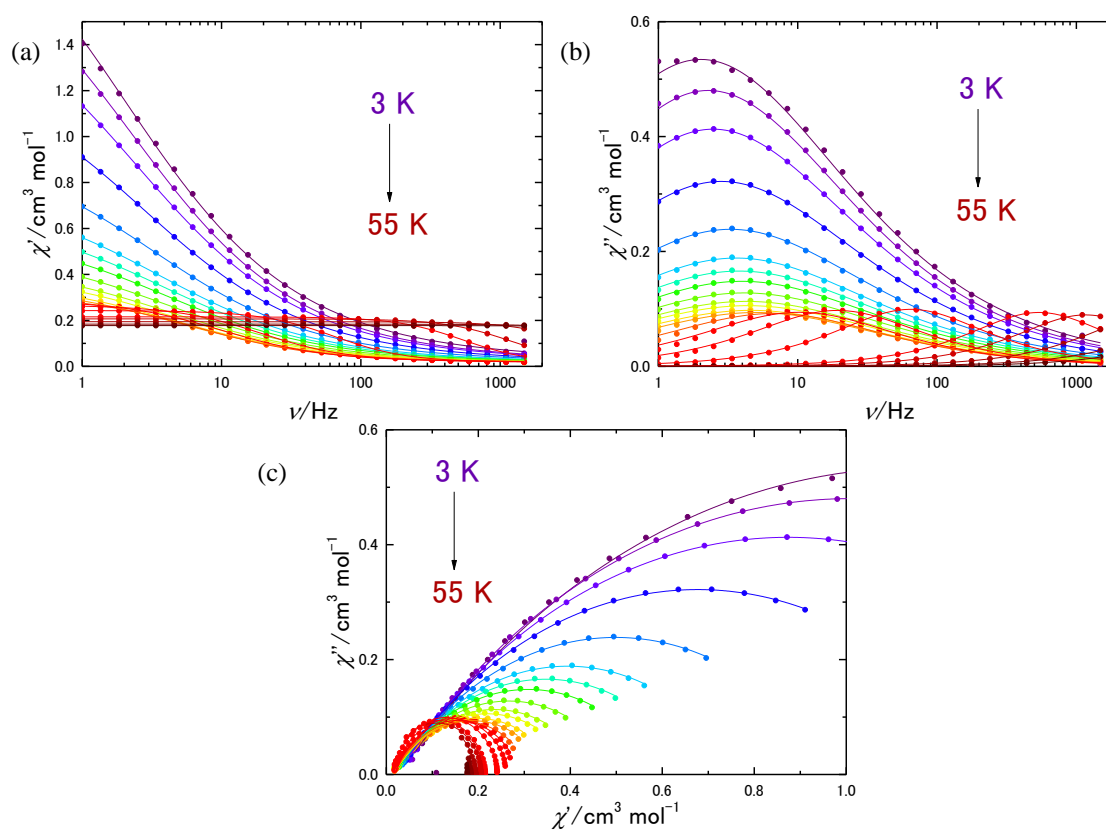

**Figure S3.** (a)  $\chi'_M$  and (b)  $\chi''_M$  versus  $\nu$  and (c) Argand plots for **1** in an  $H_{dc}$  of 3000 Oe. The solid lines were fitted by using the generalized Debye model.

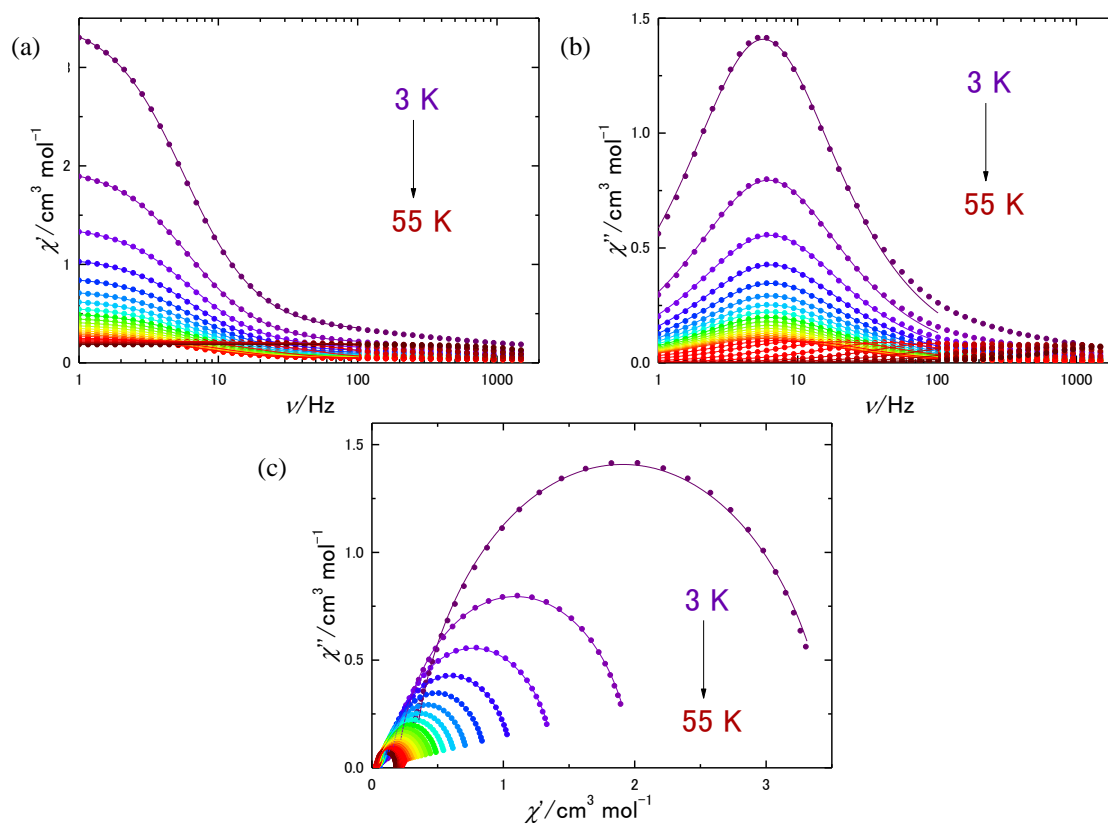

**Figure S4.** (a)  $\chi'_M$  and (b)  $\chi''_M$  versus  $\nu$  and (c) Argand plots for **2** in a zero field. The solid lines were fitted by using the generalized Debye model.

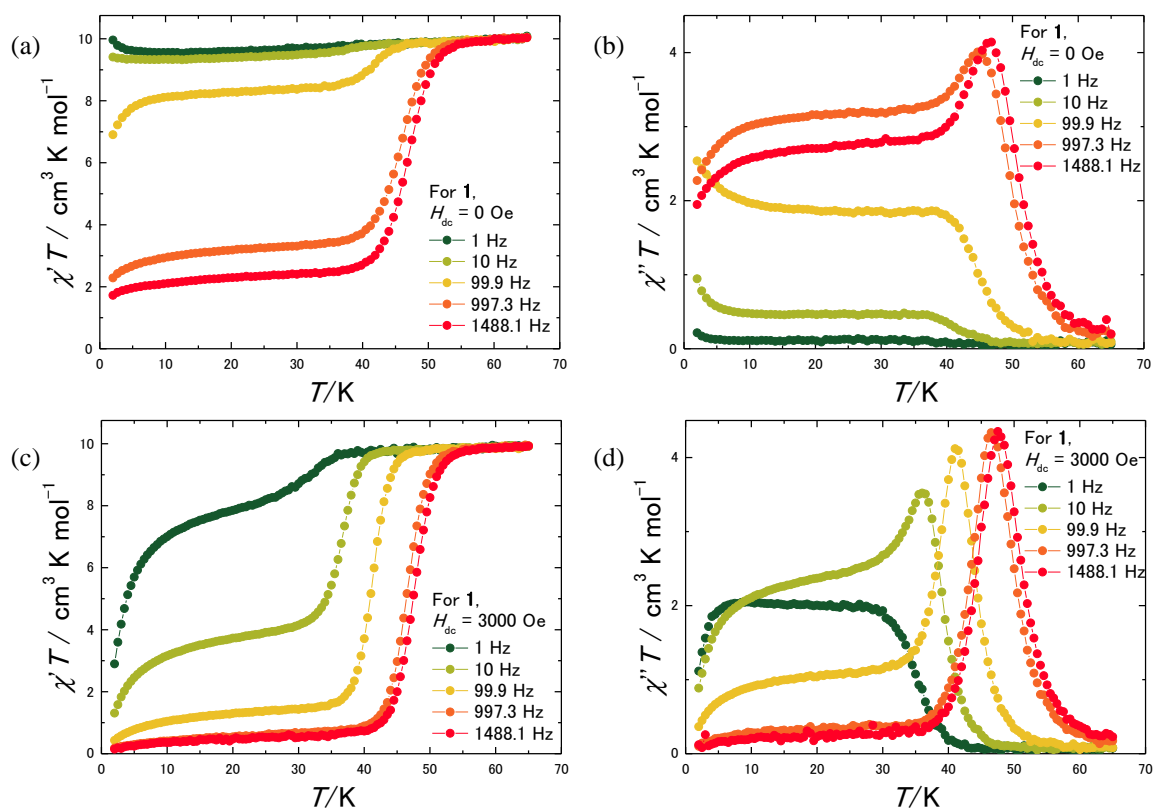

**Figure S5.** Frequency and temperature dependencies of (a and c) the real and (b and d) imaginary parts of the ac magnetic susceptibilities for **1**. Parts a and b were measured in the absence of a magnetic field, and parts c and d were done in an  $H_{dc}$  of 3000 Oe. In all graphs, the solid lines are guides for the eyes.

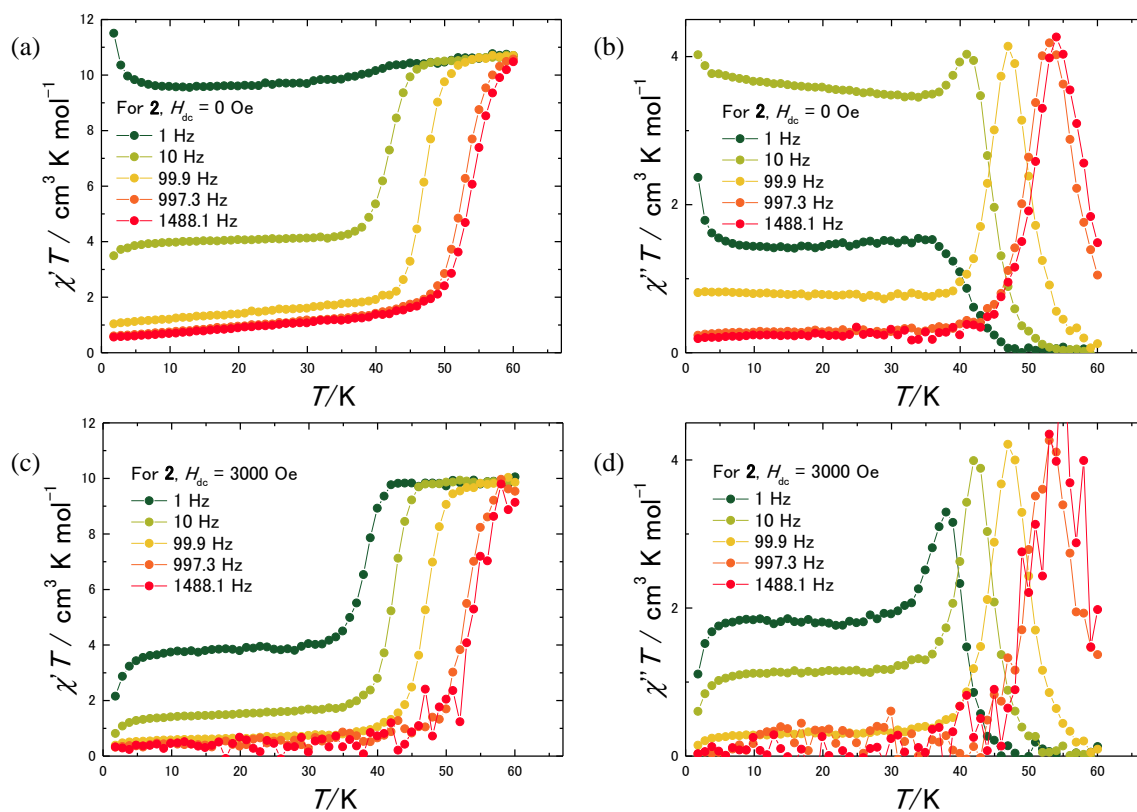

**Figure S6.** Frequency and temperature dependencies of (a and c) the real and (b and d) imaginary parts of the ac magnetic susceptibilities for **2**. Parts a and b were measured in the absence of a magnetic field, and parts c and d were done in an  $H_{\text{dc}}$  of 3000 Oe. In all graphs, the solid lines are guides for eyes.

**Table S1.** Results of fitting for **1**.

| <i>T</i> /K | $\tau$ @0 Oe/s        | $\tau$ @3000 Oe/s     |
|-------------|-----------------------|-----------------------|
| 3           | $4.70 \times 10^{-4}$ | $7.88 \times 10^{-2}$ |
| 4           | $4.11 \times 10^{-4}$ | $6.98 \times 10^{-2}$ |
| 5           | $3.73 \times 10^{-4}$ | $6.45 \times 10^{-2}$ |
| 7           | $3.31 \times 10^{-4}$ | $5.63 \times 10^{-2}$ |
| 10          | $3.01 \times 10^{-4}$ | $4.84 \times 10^{-2}$ |
| 13          | $2.85 \times 10^{-4}$ | $4.40 \times 10^{-2}$ |
| 14.4        | $2.80 \times 10^{-4}$ | $4.19 \times 10^{-2}$ |
| 16.3        | $2.73 \times 10^{-4}$ | $4.02 \times 10^{-2}$ |
| 19.2        | $2.65 \times 10^{-4}$ | $3.85 \times 10^{-2}$ |
| 22.1        | $2.64 \times 10^{-4}$ | $3.73 \times 10^{-2}$ |
| 25          | $2.58 \times 10^{-4}$ | $3.64 \times 10^{-2}$ |
| 28          | $2.58 \times 10^{-4}$ | $3.45 \times 10^{-2}$ |
| 30          | $2.51 \times 10^{-4}$ | $3.17 \times 10^{-2}$ |
| 33          | $2.51 \times 10^{-4}$ | $2.36 \times 10^{-2}$ |
| 35          | $2.49 \times 10^{-4}$ | $1.55 \times 10^{-2}$ |
| 37          | $2.38 \times 10^{-4}$ | $8.27 \times 10^{-3}$ |
| 40          | $2.34 \times 10^{-4}$ | $2.47 \times 10^{-3}$ |
| 45          | $1.36 \times 10^{-4}$ | $2.95 \times 10^{-4}$ |
| 47          | $7.42 \times 10^{-5}$ | $1.37 \times 10^{-4}$ |
| 50          | $2.97 \times 10^{-5}$ | $4.36 \times 10^{-5}$ |
| 53          | $1.59 \times 10^{-5}$ | $7.47 \times 10^{-6}$ |
| 55          | $1.06 \times 10^{-5}$ | $3.12 \times 10^{-6}$ |

**Table S2.** Results of fitting for **2**.

| <i>T</i> /K | $\tau$ @0 Oe/s        |
|-------------|-----------------------|
| 3           | $2.81 \times 10^{-2}$ |
| 5           | $2.58 \times 10^{-2}$ |
| 7           | $2.51 \times 10^{-2}$ |
| 9           | $2.48 \times 10^{-2}$ |
| 11          | $2.48 \times 10^{-2}$ |
| 13          | $2.48 \times 10^{-2}$ |
| 15          | $2.49 \times 10^{-2}$ |
| 17          | $2.51 \times 10^{-2}$ |
| 19          | $2.53 \times 10^{-2}$ |
| 21          | $2.56 \times 10^{-2}$ |
| 23          | $2.58 \times 10^{-2}$ |
| 25          | $2.60 \times 10^{-2}$ |
| 27          | $2.63 \times 10^{-2}$ |
| 29          | $2.65 \times 10^{-2}$ |
| 31          | $2.68 \times 10^{-2}$ |
| 33          | $2.70 \times 10^{-2}$ |
| 35          | $2.69 \times 10^{-2}$ |
| 39          | $2.23 \times 10^{-2}$ |
| 41          | $1.53 \times 10^{-2}$ |
| 43          | $8.19 \times 10^{-3}$ |
| 45          | $3.74 \times 10^{-3}$ |
| 47          | $1.63 \times 10^{-3}$ |
| 49          | $7.22 \times 10^{-4}$ |
| 51          | $3.53 \times 10^{-4}$ |
| 53          | $1.34 \times 10^{-4}$ |
| 55          | $5.85 \times 10^{-5}$ |



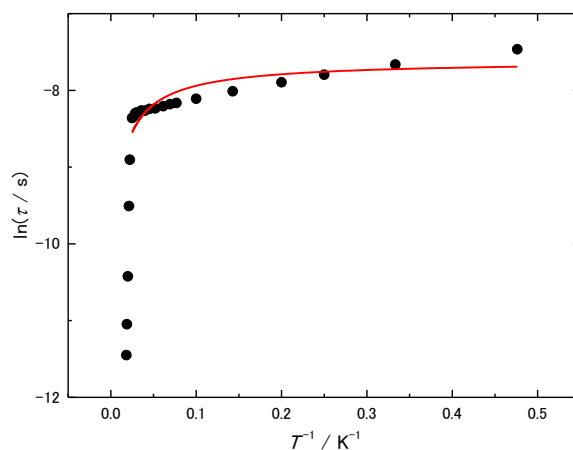

**Figure S7.** Fitting of the Arrhenius plots for **1** in a zero field considering direct process and QTM using the following equation:

$$\tau = \left\{ AT + \frac{1}{\tau_{QTM}} \right\}^{-1}$$

where the first and second terms represent a direct process and QTM,

$A$  is the coefficients of direct process, and  $\tau_{QTM}$  is the QTM time

$A = 78.2 \text{ s}^{-1}\text{K}^{-1}$ ,  $\tau_{QTM} = 4.94 \times 10^{-4} \text{ s}$ .

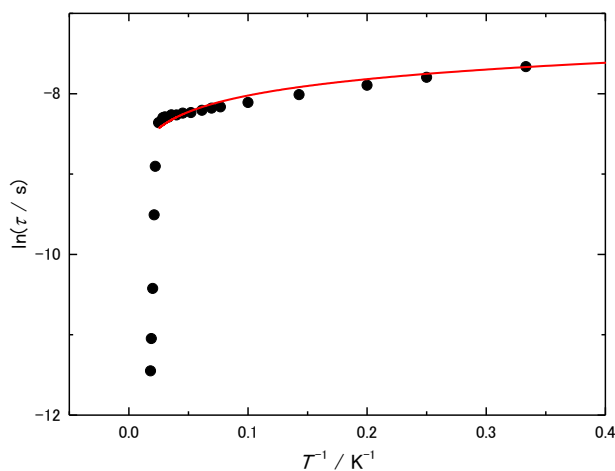

**Figure S8.** Fitting of the Arrhenius plots for **1** in a zero field considering the Raman process and QTM using the following equation:

$$\tau = \left\{ CT^n + \frac{1}{\tau_{QTM}} \right\}^{-1}$$

where the first and second terms represent a Raman process and QTM,

$C$  is the coefficients of Raman process, and  $n$  is the exponent of the Raman process.

$C = 1548 \text{ s}^{-1}\text{K}^{-n}$ ,  $n = 0.29$ ,  $\tau_{QTM} = 4.41 \times 10^{22} \text{ s}$ . As shown in above, the fitting gave meaningless parameters.

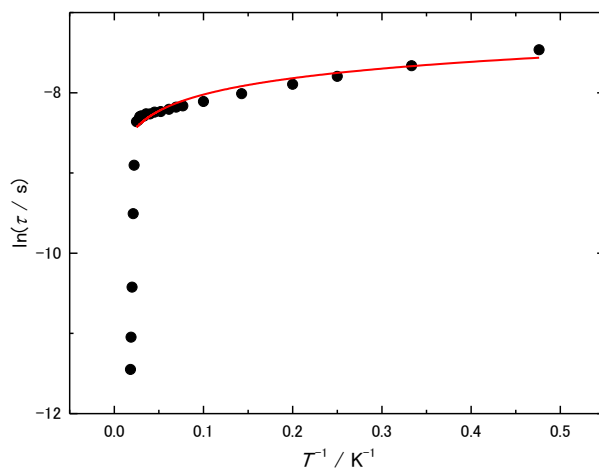

**Figure S9.** Fitting of the Arrhenius plots for **1** in a zero field considering direct process, Raman process and QTM using the following equation:

$$\tau = \left\{ AT + CT^n + \frac{1}{\tau_{QTM}} \right\}^{-1}$$

$A = 5.27 \times 10^{-17} \text{ s}^{-1}\text{K}^{-1}$ ,  $C = 1548 \text{ s}^{-1}\text{K}^{-n}$ ,  $n = 0.29$ ,  $\tau_{QTM} = 4.41 \times 10^{22} \text{ s}$ . As shown in above, the fitting gave meaningless parameters.

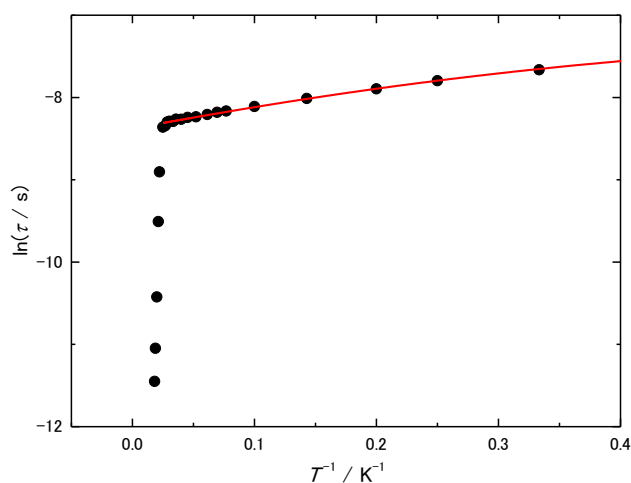

**Figure S10.** Fitting of the Arrhenius plots for **1** in a zero field considering an Orbach process and QTM using the following equation:

$$\tau = \left\{ \frac{1}{\tau_0} \exp\left(-\frac{U_{eff}}{k_B T}\right) + \frac{1}{\tau_{QTM}} \right\}^{-1}$$

where the first and second terms represent an Orbach process and QTM.  $U_{eff} = 3.92 \text{ cm}^{-1}$ ,  $\tau_0 = 3.3 \times 10^{-4} \text{ s}$ ,  $\tau_{QTM} = 7.84 \times 10^{-4} \text{ s}$

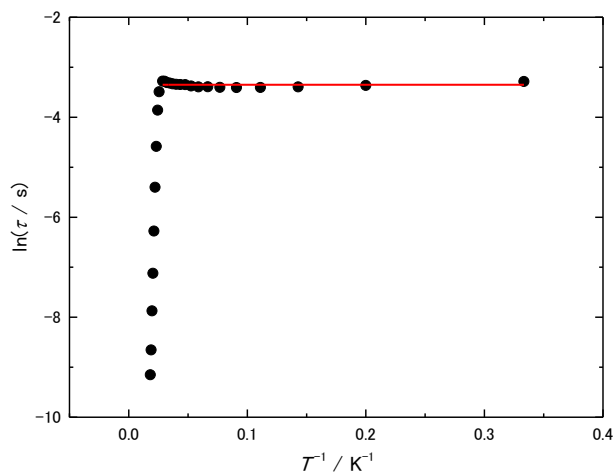

**Figure S11.** Fitting of the Arrhenius plots for **2** in a zero field considering QTM according to the following equation.

$$\tau = \left\{ \frac{1}{\tau_{QTM}} \right\}^{-1}$$

$$\tau_{QTM} = 3.51 \times 10^{-2} \text{ s.}$$

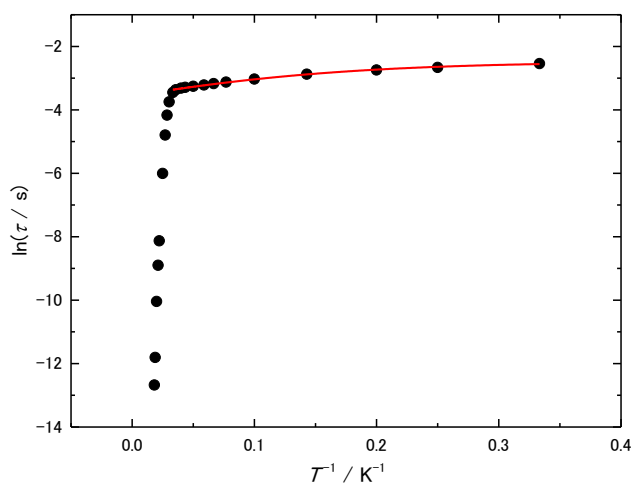

**Figure S12.** Fitting of the Arrhenius plots for **1** in an  $H_{dc}$  of 3000 Oe considering an Orbach process and QTM using the following equation.

$$\tau = \left\{ \frac{1}{\tau_0} \exp\left(-\frac{U_{eff}}{k_B T}\right) + \frac{1}{\tau_{QTM}} \right\}^{-1}$$

$$U_{eff} = 9.61 \text{ cm}^{-1}, \tau_0 = 4.2 \times 10^{-2} \text{ s}, \tau_{QTM} = 8.83 \times 10^{-2} \text{ s.}$$
